# Supplementary material
Source: HighWire-hosted journal article supplement (http://molpharm.aspetjournals.org/highwire/filestream/82037/field_highwire_adjunct_files/0/Supplemental_111468.pdf)
Supplement: Supplemental_111468.pdf [file Supplemental_111468.pdf]

Efficient high-throughput screening by ER  $\text{Ca}^{2+}$  measurement to identify inhibitors of ryanodine receptor  $\text{Ca}^{2+}$ -release channels

Takashi Murayama, Nagomi Kurebayashi, Mari Ishigami-Yuasa, Shuichi Mori, Yukina Suzuki, Ryunosuke Akima, Haruo Ogawa, Junji Suzuki<sup>2</sup>, Kazunori Kanemaru, Hideto Oyamada, Yuji Kiuchi, Masamitsu Iino, Hiroyuki Kagechika, Takashi Sakurai

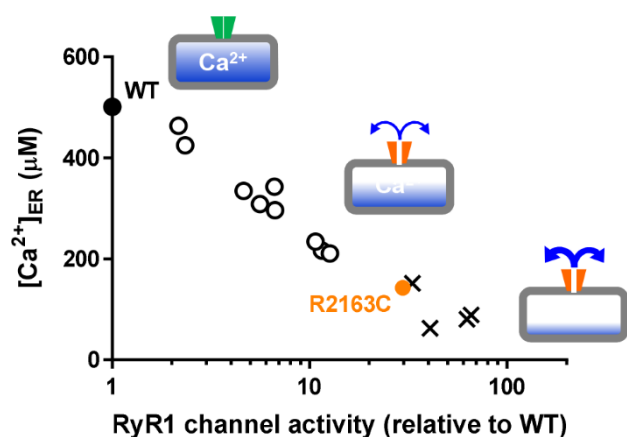

**Supplementary Fig. 1.** Relationship between RyR1 channel activity and  $[\text{Ca}^{2+}]_{\text{ER}}$  in HEK293 cells expressing wild-type (WT, *filled circle*) or mutations associated with MH (*open circles*) and MH/CCD (*crosses*) in the central region. Data are modified from Murayama et al. (Murayama et al., 2016). Schematic illustrations represent  $[\text{Ca}^{2+}]_{\text{ER}}$  and  $\text{Ca}^{2+}$  leakage through RyR1 in the indicated states. Note that  $[\text{Ca}^{2+}]_{\text{ER}}$  are reduced to inversely correlate with the channel activity of the mutant RyR1, indicating  $\text{Ca}^{2+}$  leakage from the ER.

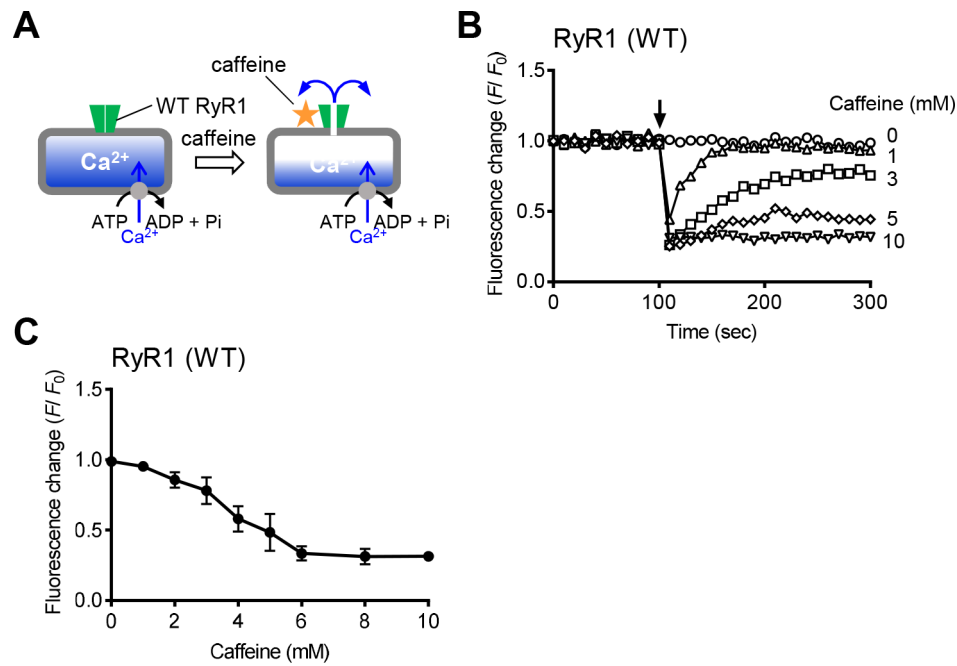

**Supplementary Fig. 2.** Effect of caffeine on  $[\text{Ca}^{2+}]_{\text{ER}}$  in the WT RyR1 cells. (A) In the WT RyR1 cells, caffeine activates the RyR1 channels to cause  $\text{Ca}^{2+}$  leakage from ER. (B) Effect of caffeine on time-lapse R-CEPIA1er fluorescence measurement of the WT RyR1 cells. Application of caffeine at 1-10 mM (arrows) resulted in a rapid decrease in  $[\text{Ca}^{2+}]_{\text{ER}}$  followed by gradual recovery toward their respective steady-state levels. (C) Caffeine dose-dependency of steady-state level of R-CEPIA1er fluorescence of the WT RyR1 cells. The steady-state level was reduced with caffeine in a dose-dependent manner. Data are the mean  $\pm$  SD ( $n = 3$ ).

**Supplementary TABLE 1. Compounds that increased  $F/F_0$  in WT cells by >3 SDs.**

| Compounds        | Mean $F/F_0$ (RC) | Mean $F/F_0$ (WT) | $\Delta F$ (w/o cell) | $\Delta F$ (w cell) |
|------------------|-------------------|-------------------|-----------------------|---------------------|
| Daunorubicin     | 3.88              | 2.36              | $18.4 \pm 3.0$        | $17.3 \pm 0.2$      |
| Doxorubicin      | 4.97              | 3.79              | $28.2 \pm 2.0$        | $26.9 \pm 1.8$      |
| Epirubicin       | 3.75              | 3.05              | $20.6 \pm 2.0$        | $17.9 \pm 0.5$      |
| Erythrosine      | 10.15             | 6.11              | $53.0 \pm 2.4$        | $48.7 \pm 1.5$      |
| Homidium Bromide | 2.66              | 1.69              | $6.5 \pm 0.6$         | $7.3 \pm 0.7$       |
| Oxidopamine      | 2.93              | 3.13              | $13.4 \pm 1.1$        | $12.8 \pm 2.2$      |
| Pararosaniline   | 1.37              | 1.2               | $2.5 \pm 0.1$         | $2.4 \pm 0.4$       |
| Pyrvinium        | 1.66              | 1.35              | $5.3 \pm 0.4$         | $7.6 \pm 0.8$       |

Mean  $F/F_0$  represents ratio of the averaged R-CEPIA1er fluorescence for the last 100 seconds ( $F$ ) to that for the first 100 seconds ( $F_0$ ) in R2163C (RC) and WT RyR1 cells induced by the compounds.  $\Delta F$  represents fluorescence changes by compounds in the presence (w cell) and absence (w/o cell) of the WT RyR1 cells. All the 8 compounds that increased  $F/F_0$  in WT cells by >3 SDs exhibited autofluorescence.

**Supplementary TABLE 2. Effects of hit and related compounds on  $[Ca^{2+}]_{ER}$  of mutant and WT RyR1 cells.**

| Compounds                                           | Mean $F/F_0$ (Mutant RyR1) | Mean $F/F_0$ (WT RyR1) |
|-----------------------------------------------------|----------------------------|------------------------|
| <b>Oxolinic Acid</b>                                | <b>1.66</b>                | <b>1.01</b>            |
| Cinoxacin                                           | 1.05                       | 0.98                   |
| Ciprofloxacin                                       | 1.04                       | 0.98                   |
| Enoxacin                                            | 0.96                       | 0.97                   |
| Enrofloxacin                                        | 0.97                       | 1.02                   |
| Flumequine                                          | 0.98                       | 1.01                   |
| Gatifloxacin                                        | 1.00                       | 0.99                   |
| Gemifloxacin                                        | 0.92                       | 1.00                   |
| Levofloxacin                                        | 0.94                       | 0.99                   |
| Lomefloxacin                                        | 0.89                       | 0.95                   |
| Moxifloxacin                                        | 0.87                       | 0.95                   |
| Norfloxacin                                         | 0.99                       | 0.99                   |
| Ofloxacin                                           | 0.95                       | 0.96                   |
| Orbifloxacin                                        | 0.95                       | 0.94                   |
| Pefloxacin                                          | 0.96                       | 0.93                   |
| Pipemidic Acid                                      | 0.94                       | 0.90                   |
| Piromidic Acid                                      | 0.97                       | 0.97                   |
| Sarafloxacin                                        | 1.01                       | 0.94                   |
| <b>9-Aminoacridine</b>                              | <b>1.62</b>                | <b>0.98</b>            |
| Amsacrine                                           | 0.88                       | 1.04                   |
| Ethacridine                                         | 1.06                       | 1.04                   |
| Mepacrine                                           | 1.00                       | 0.96                   |
| <b>Alexidine</b>                                    | <b>1.71</b>                | <b>0.84</b>            |
| Chlorhexidine                                       | 0.93                       | 0.97                   |
| Metformin                                           | 0.89                       | 1.01                   |
| Phenformin                                          | 0.99                       | 1.00                   |
| Phenylbiguanide                                     | 0.96                       | 0.98                   |
| Proguanil                                           | 0.96                       | 0.95                   |
| <b>Compounds described in Rebbeck et al. (2017)</b> |                            |                        |
| Chloroxine                                          | 0.80                       | 0.96                   |
| Disulfiram                                          | 0.60                       | 0.78                   |
| Tacrolimus                                          | 0.70                       | 1.00                   |

Hit compounds are indicated in *bold* and the related compounds in the library used in this study are listed below. Values indicate  $F/F_0$  of R-CEPIA1er fluorescence in mutant (R2163C) and WT RyR1 cells induced by the compounds (see **Fig. 3**).
